# Supplementary material for: A loop-mediated, isothermal amplification-based method for visual detection of Vibrio parahaemolyticus within only 1 h, from shrimp sampling to results
Source: Royal Society of Chemistry journal article supplement (doi:10.1039/c7ay00165g), 2017-01-01
Supplement: c7ay00165g1.pdf [file c7ay00165g1.pdf]

1 **A loop-mediated isothermal amplification-based method**  
2 **for the visual detection of *Vibrio parahaemolyticus* within**  
3 **only 1 hour, from shrimp sampling to results**

4 Rui Wang <sup>a</sup>, Xingning Xiao <sup>a</sup>, Yuan Chen <sup>a</sup>, Jun Wu <sup>b</sup>, Wenjuan Qian <sup>a</sup>, Liu Wang <sup>a</sup>,  
5 Yuan Liu <sup>c</sup>, Feng Ji <sup>d</sup> and Jian Wu <sup>a\*</sup>

6 <sup>a</sup> College of Biosystems Engineering and Food Science, Zhejiang University,  
7 Hangzhou, 310058, China.

8 <sup>b</sup> Linan Center for Disease Control and Prevention, Linan, 311300, China.

9 <sup>c</sup> College of Food Science and Technology, Shanghai Ocean University, Shanghai,  
10 201306, China.

11 <sup>d</sup> The First Affiliated Hospital of College of Medicine, Zhejiang University,  
12 Hangzhou, 310003, China.

13 **Correspondence**

14 (J. Wu) E-mail: [wujian69@zju.edu.cn](mailto:wujian69@zju.edu.cn). Tel: 0086-571-88982180

15 Fax: 0086-571-88982180 College of Biosystems Engineering and Food Science,  
16 Zhejiang University, Hangzhou 310058, China.

17

18

19

20

21

22

23

24 **Materials and reagents**

25 A total of 26 bacterial strains including 5 *V. parahaemolyticus* isolates, 10 non-  
26 *parahaemolyticus* *Vibrio* isolates and 11 non-*Vibrio* bacteria were used in this study.  
27 As shown in **Table S1**, All strains were purchased from American Type Culture  
28 Collection (ATCC), USA, except *V. parahaemolyticus* KP9 and *V. parahaemolyticus*  
29 ZJ9N (kindly provided by School of Animal Science, Zhejiang University). All the  
30 natural seafood samples were purchased from local market of Hangzhou, China.

31 Regents of sodium hydroxide (NaOH) and agarose were both purchased from  
32 Sinopharm Chemical Reagent Co., Ltd. (Shanghai, China). All primers were  
33 synthesized by Sangon Biotech Co., Ltd. (Shanghai, China). TIANamp bacteria DNA  
34 kit was purchased from Tiangen Biotech Co., Ltd. (Beijing, China) for standard DNA  
35 extraction. TaKaRa Taq™ Hot Start amplification kit was purchased from Takara Bio  
36 Inc. (Dalian, China) for PCR amplification. For LAMP amplification, *Bst* DNA  
37 polymerase and thermoPol buffer were purchased from New England Biolabs Inc.,  
38 (Ipswich, MA). Betaine was purchased from Sigma-Aldrich Co. LLC. (St Louis, MO,  
39 USA). dNTP (2.5 mM each) was purchased from Sangon Biotech Co., Ltd. (Shanghai,  
40 China). SYTO 9 was purchased from Thermo Fisher Scientific Inc. (Waltham, MA  
41 USA). MgSO<sub>4</sub> was purchased from Sangon Biotech Co., Ltd. (Shanghai, China).  
42 Thermostable inorganic pyrophosphatase was purchased from New England Biolabs  
43 Inc., (Ipswich, MA).

44 **Primer designed for PCR amplification.**

45 The primers recognized *V. parahaemolyticus*-specific thermolabile haemolysin (*tlh*)

46 gene (GenBank NO. M36437) were designed by Primer premier 5.0. The *tlh*-F (5'-  
47 GACATTACGTTCTTCGCCGC-3') and *tlh*-R (5'-GTTCTTCGCCAGTTTTGCGT-  
48 3') were used as PCR primers and the length of DNA amplicon was 354 bp. PCR  
49 reaction was carried out with TaKaRa Taq™ Hot Start amplification kit (Takara Bio  
50 Inc., Dalian, China) for 30 cycles in a MyiQ2 Real Time PCR Detection System  
51 (BioRad, Hercules, CA, USA).

### 52 ***Boiling method.***

53 100 µL of *V. parahaemolyticus* suspension was heated at 95 °C for 10 min. After  
54 cell debris pelleted by centrifugation at 20,000 g and 4 °C for 5 min, 1 µL of the  
55 supernatant was used as DNA template for PCR and LAMP assay.

### 56 ***Commercial kit.***

57 TIANamp bacteria DNA kit (Tiangen Biotech Co., Ltd, Beijing, China) was used for  
58 DNA extraction and purification according to its operation manual. DNA templates  
59 were dissolved in 200 µL tris-EDTA (TE) buffer and stored at -20 °C. For LAMP and  
60 PCR assay, 1 µL DNA was used as template.

61

62

63

64

65

66

68 Table S1 Bacterial isolates used in this study.

| Strain                                            | Strain ID  | <i>tlh</i> amplification |     | Source <sup>a</sup> |
|---------------------------------------------------|------------|--------------------------|-----|---------------------|
|                                                   |            | LAMP                     | PCR |                     |
| <i>Vibrio parahaemolyticus</i>                    | ATCC17802  | P                        | P   | ATCC                |
| <i>Vibrio parahaemolyticus</i>                    | ATCC33846  | P                        | P   | ATCC                |
| <i>Vibrio parahaemolyticus</i>                    | ATCC33847  | P                        | P   | ATCC                |
| <i>Vibrio parahaemolyticus</i>                    | KP9        | P                        | P   | ZJ                  |
| <i>Vibrio parahaemolyticus</i>                    | ZJ9N       | P                        | P   | ZJ                  |
| <i>Vibrio harveyi</i>                             | ATCC14126  | N                        | N   | ATCC                |
| <i>Vibrio vulnificus</i>                          | ATCC27562  | N                        | N   | ATCC                |
| <i>Vibrio vulnificus</i>                          | ATCC29306  | N                        | N   | ATCC                |
| <i>Vibrio vulnificus</i>                          | ATCC33816  | N                        | N   | ATCC                |
| <i>Vibrio cholerae</i>                            | ATCC14035  | N                        | N   | ATCC                |
| <i>Vibrio cincinnatiensis</i>                     | ATCC35912  | N                        | N   | ATCC                |
| <i>Vibrio fluvialis</i>                           | ATCC 33809 | N                        | N   | ATCC                |
| <i>Vibrio mimicus</i>                             | ATCC33653  | N                        | N   | ATCC                |
| <i>Vibrio mimicus</i>                             | ATCC33655  | N                        | N   | ATCC                |
| <i>Vibrio natriegens</i>                          | ATCC14048  | N                        | N   | ATCC                |
| <i>E. coli</i> O157:H7                            | ATCC43889  | N                        | N   | ATCC                |
| <i>Escherichia coli</i>                           | ATCC25922  | N                        | N   | ATCC                |
| <i>Staphylococcus aureus</i> subsp. <i>aureus</i> | ATCC6538   | N                        | N   | ATCC                |
| <i>Bacillus subtilis</i>                          | ATCC6633   | N                        | N   | ATCC                |
| <i>Candida albicans</i>                           | ATCC10231  | N                        | N   | ATCC                |
| <i>Salmonella typhimurium</i>                     | ATCC14028  | N                        | N   | ATCC                |
| <i>Aspergillus brasiliensis</i>                   | ATCC16404  | N                        | N   | ATCC                |
| <i>Escherichia coli</i>                           | ATCC8739   | N                        | N   | ATCC                |
| <i>Pseudomonas aeruginosa</i>                     | ATCC9027   | N                        | N   | ATCC                |
| <i>Listeria monocytogenes</i>                     | ATCC19115  | N                        | N   | ATCC                |

69 P/N, positive/negative results.

70 <sup>a</sup>ATCC, American Type Culture Collection. ZJ, provided by School of Animal  
71 Science, Zhejiang University.

**Table S2 Estimation of the sensitivity of traditional sampling method for *V. parahaemolyticus* detection from spiked shrimp samples.**

| concentration of<br><i>V. parahaemolyticus</i><br>(CFU/g) | repeat | Ct value |       |       | mean of Ct<br>values | SD   | RSD (%) | mean of all<br>Ct values | SD <sup>r</sup> | RSD(%) <sup>r</sup> | Time (min) <sup>c</sup> |
|-----------------------------------------------------------|--------|----------|-------|-------|----------------------|------|---------|--------------------------|-----------------|---------------------|-------------------------|
|                                                           |        | 1        | 2     | 3     |                      |      |         |                          |                 |                     |                         |
| 1.25×10 <sup>6</sup>                                      | 1      | 20.11    | 20.30 | 20.25 | 20.22                | 0.10 | 0.49    |                          |                 |                     |                         |
|                                                           | 2      | 20.11    | 20.15 | 20.03 | 20.10                | 0.06 | 0.30    | 20.29                    | 0.23            | 1.16                | 20.29                   |
|                                                           | 3      | 20.67    | 20.42 | 20.56 | 20.55                | 0.13 | 0.61    |                          |                 |                     |                         |
| 1.30×10 <sup>5</sup>                                      | 1      | 22.21    | 22.45 | 22.33 | 22.33                | 0.12 | 0.54    |                          |                 |                     |                         |
|                                                           | 2      | 21.87    | 21.63 | 21.89 | 21.80                | 0.14 | 0.66    | 22.04                    | 0.27            | 1.23                | 22.04                   |
|                                                           | 3      | 22.06    | 21.87 | 22.02 | 21.98                | 0.10 | 0.46    |                          |                 |                     |                         |
| 4.50×10 <sup>4</sup>                                      | 1      | 24.97    | 25.03 | 24.82 | 24.94                | 0.11 | 0.43    |                          |                 |                     |                         |
|                                                           | 2      | 27.43    | 27.39 | 27.21 | 27.34                | 0.12 | 0.43    | 25.77                    | 1.37            | 5.31                | 25.77                   |
|                                                           | 3      | 24.91    | 25.02 | 25.11 | 25.01                | 0.10 | 0.40    |                          |                 |                     |                         |
| 3.00×10 <sup>3</sup>                                      | 1      | 30.53    | 31.31 | 31.11 | 30.98                | 0.41 | 1.31    |                          |                 |                     |                         |
|                                                           | 2      | 32.07    | 32.18 | 33.02 | 32.42                | 0.52 | 1.60    | 31.58                    | 0.75            | 2.38                | 31.58                   |
|                                                           | 3      | 31.00    | 31.49 | 31.48 | 31.32                | 0.28 | 0.89    |                          |                 |                     |                         |
| 2.50×10 <sup>2</sup>                                      | 1      | 43.61    | _f    | _f    | 43.61                | _f   | _f      |                          |                 |                     |                         |
|                                                           | 2      | _f       | 42.55 | _f    | 42.55                | _f   | _f      | 43.08                    | 0.75            | 1.74                | 43.08                   |
|                                                           | 3      | _f       | _f    | _f    | _f                   | _f   | _f      |                          |                 |                     |                         |
| 0.00×10 <sup>0</sup>                                      | 1      | _f       | _f    | _f    | _f                   | _f   | _f      |                          |                 |                     |                         |
|                                                           | 2      | _f       | _f    | _f    | _f                   | _f   | _f      | _f                       | _f              | _f                  | _f                      |
|                                                           | 3      | _f       | _f    | _f    | _f                   | _f   | _f      |                          |                 |                     |                         |

<sup>r</sup> Calculations based on all Ct values.

<sup>f</sup>No data.

<sup>c</sup> Every cycle takes 60s.

**Table S3 Primers of LAMP and PCR for the detection of total *V. parahaemolyticus*.**

|              |         | Sequence (5'-3')                          | Gene position   |
|--------------|---------|-------------------------------------------|-----------------|
| LAMP primers | Tlh-FIP | CTGTCACCGAGTGCAACCACTTAACCACACGATCTGGAGCA | 508-526/560-581 |
|              | Tlh-BIP | GCATCACAATGGCGCTTCCCACCGTTGGAGAAGTGACCTA  | 610-629/650-669 |
|              | Tlh-F3  | CGCTGACAATCGCTTCTCAT                      | 486-505         |
|              | Tlh-B3  | GTTCTTCGCTTTGGCAATGT                      | 686-705         |
|              | Tlh-LF  | TGTTGATTTGATCTGGCTGC                      | 540-559         |
|              | Tlh-LB  | TAACCCGAACAGCTGGTTC                       | 630-648         |
| PCR primers  | Tlh-F   | GACATTACGTTCTTCGCCGC                      | 469-488         |
|              | Tlh-R   | GTTCTTCGCCAGTTTTGCGT                      | 803-822         |

**Table S4 Amplification components for fluorescent LAMP assay.**

| <b>Component</b>          | <b>Final concentration</b> |
|---------------------------|----------------------------|
| <b>ThermoPol Buffer</b>   | <b>1X</b>                  |
| <b>MgSO<sub>4</sub></b>   | <b>6 mM</b>                |
| <b>FIP and BIP</b>        | <b>1.6 μM (each)</b>       |
| <b>F3 and B3</b>          | <b>0.2 μM (each)</b>       |
| <b>LF and LB</b>          | <b>0.4 μM (each)</b>       |
| <b>Betaine</b>            | <b>0.8 M</b>               |
| <b>dNTP</b>               | <b>1.4 mM</b>              |
| <b>Bst DNA polymerase</b> | <b>8 U</b>                 |
| <b>SYTO 9</b>             | <b>4 μM</b>                |
| <b>DNA template</b>       | <b>1 μL</b>                |
| <b>Sterile water</b>      | <b>up to 50 μL</b>         |

**Table S5 Detection of *V. parahaemolyticus* in natural seafood samples.**

| <b>Sample type</b>        | <b>No. of samples</b> | <b>Visual detection method</b> | <b>PCR</b>           | <b>Culture-based method</b> |
|---------------------------|-----------------------|--------------------------------|----------------------|-----------------------------|
| <b>Shrimp</b>             | <b>32</b>             | <b>3</b>                       | <b>3<sup>a</sup></b> | <b>3<sup>a</sup></b>        |
| <b>Cuttlefish</b>         | <b>11</b>             | <b>2</b>                       | <b>2<sup>a</sup></b> | <b>2<sup>a</sup></b>        |
| <b>Oyster</b>             | <b>10</b>             | <b>4</b>                       | <b>3<sup>a</sup></b> | <b>4<sup>a</sup></b>        |
| <b>Jellyfish</b>          | <b>15</b>             | <b>2</b>                       | <b>2<sup>a</sup></b> | <b>2<sup>a</sup></b>        |
| <b>Crab</b>               | <b>28</b>             | <b>4</b>                       | <b>4<sup>a</sup></b> | <b>4<sup>a</sup></b>        |
| <b>Sleevefish</b>         | <b>16</b>             | <b>3</b>                       | <b>3<sup>a</sup></b> | <b>3<sup>a</sup></b>        |
| <b>Lobster</b>            | <b>17</b>             | <b>2</b>                       | <b>2<sup>a</sup></b> | <b>2<sup>a</sup></b>        |
| <b>Weever</b>             | <b>12</b>             | <b>2</b>                       | <b>1<sup>a</sup></b> | <b>1<sup>a</sup></b>        |
| <b>Razor clam</b>         | <b>33</b>             | <b>3</b>                       | <b>3<sup>a</sup></b> | <b>3<sup>a</sup></b>        |
| <b>Clam</b>               | <b>42</b>             | <b>3</b>                       | <b>3<sup>a</sup></b> | <b>2<sup>a</sup></b>        |
| <b>Scallop</b>            | <b>23</b>             | <b>2</b>                       | <b>1<sup>a</sup></b> | <b>2<sup>a</sup></b>        |
| <b>Porphyra</b>           | <b>36</b>             | <b>2</b>                       | <b>2<sup>a</sup></b> | <b>2<sup>a</sup></b>        |
| <b>Laminaria japonica</b> | <b>28</b>             | <b>3</b>                       | <b>3<sup>a</sup></b> | <b>3<sup>a</sup></b>        |
| <b>Total</b>              | <b>303</b>            | <b>35</b>                      | <b>32</b>            | <b>33</b>                   |
| <b>Positive rate</b>      | <b>-</b>              | <b>11.6 %</b>                  | <b>10.6 %</b>        | <b>10.9 %</b>               |

<sup>a</sup>, LAMP positive.



**Table S6 LAMP amplification components for visual detection.**

| <b>Component</b>                              | <b>Final concentration</b> |
|-----------------------------------------------|----------------------------|
| <b>ThermoPol Buffer</b>                       | <b>1X</b>                  |
| <b>MgSO<sub>4</sub></b>                       | <b>6 mM</b>                |
| <b>FIP and BIP</b>                            | <b>1.6 μM (each)</b>       |
| <b>F3 and B3</b>                              | <b>0.2 μM (each)</b>       |
| <b>LF and LB</b>                              | <b>0.4 μM (each)</b>       |
| <b>Betaine</b>                                | <b>0.8 M</b>               |
| <b>dNTP</b>                                   | <b>1.4 mM</b>              |
| <b>Bst DNA polymerase</b>                     | <b>8 U</b>                 |
| <b>SYTO 9</b>                                 | <b>4 μM</b>                |
| <b>Thermostable inorganic pyrophosphatase</b> | <b>0.1 U</b>               |
| <b>DNA template</b>                           | <b>1 μL</b>                |
| <b>Sterile water</b>                          | <b>up to 50 μL</b>         |
